# Supplementary material for: Coronary Artery Disease Associated Transcription Factor TCF21 Regulates Smooth Muscle Precursor Cells That Contribute to the Fibrous Cap
Source: PLoS Genet. 2015 May 28;11(5):e1005155. doi: 10.1371/journal.pgen.1005155 (PMC4447275; doi:10.1371/journal.pgen.1005155)
Supplement: S1 Table — (XLSX) [file pgen.1005155.s009.xlsx]

## Sheet: Sheet1
Table S1.Cardiovascular disease functional annotation categories.
Categories	Diseases or Functions Annotation	Q-Value	Molecules	# Molecules
Cardiovascular Disease	vascular disease	3.26e-17	ACTA2,AHR,AKT3,ANGPT1,ARHGDIB,BDNF,CAV1,CD55,CDH13,CEMIP,COL1A1,COL1A2,COL5A2,CTSC,CTSK,CTSS,CXCL2,CXCL3,DNAJB4,EFEMP2,EGR2,FADS1,FBN1,FN1,GCLM,GPRC5A,GRIK2,HIVEP1,HMOX1,HSPH1,HTRA1,IDH1,IL1A,IL1B,IL1R1,KCNK2,KDR,LOX,LPAR1,MBNL2,MFGE8,MMP1,MMP3,MYLK,NCEH1,NEDD9,NNMT,NRP1,PCSK6,PDLIM5,PIK3C2A,PLOD1,PPP3CB,PTGS1,SEMA3D,SGCD,SGK1,SLC2A3,SLC7A11,SPARC,SUB1,TGFBR2,THBS1,TIMP3,TKT,TNFRSF11B,TNIK,TREM1,…	73
Cardiovascular Disease	disorder of artery	8.47e-17	ACTA2,AHR,AKT3,ARHGDIB,BDNF,CAV1,CD55,CDH13,CEMIP,COL1A1,COL1A2,COL5A2,CTSC,CTSK,CTSS,CXCL2,DNAJB4,EFEMP2,EGR2,FADS1,FBN1,FN1,GCLM,GPRC5A,HMOX1,HSPH1,IL1A,IL1B,IL1R1,KDR,LOX,LPAR1,MBNL2,MFGE8,MMP1,MMP3,MYLK,NCEH1,NEDD9,NNMT,NRP1,PCSK6,PDLIM5,PIK3C2A,PLOD1,PTGS1,SGCD,SGK1,SLC2A3,SLC7A11,SPARC,SUB1,TGFBR2,THBS1,TIMP3,TKT,TNFRSF11B,TNIK,TREM1,TUBA1A,VCAM1,VEPH1,VKORC1	63
Cardiovascular Disease	occlusion of artery	4.04e-12	AHR,ARHGDIB,BDNF,CAV1,CD55,CDH13,CEMIP,COL1A1,COL1A2,COL5A2,CTSC,CTSS,CXCL2,DNAJB4,EGR2,FADS1,FN1,GCLM,GPRC5A,HMOX1,HSPH1,IL1A,IL1B,IL1R1,KDR,LPAR1,MBNL2,MFGE8,MMP3,NCEH1,NEDD9,NNMT,PDLIM5,PTGS1,SGCD,SGK1,SLC2A3,SLC7A11,SUB1,TGFBR2,THBS1,TIMP3,TKT,TNFRSF11B,TNIK,TREM1,TUBA1A,VCAM1,VEPH1	49
Cardiovascular Disease	aneurysm	2.99e-09	ACTA2,COL1A1,CTSC,CTSK,CTSS,EFEMP2,FBN1,LOX,MMP3,MYLK,PIK3C2A,SPARC,TGFBR2,TIMP3,VHL	15
Cardiovascular Disease	vascular lesion	6.68e-08	ACTA2,AHR,COL1A1,CTSC,CTSK,CTSS,CXCL2,EFEMP2,FBN1,HMOX1,IL1B,LOX,MMP3,MYLK,PIK3C2A,SPARC,TGFBR2,THBS1,TIMP3,TNFRSF11B,VCAM1,VHL	22
Cardiovascular Disease	peripheral arterial occlusive disease	1.23e-07	ARHGDIB,BDNF,CEMIP,COL1A1,COL1A2,CTSC,CTSS,DNAJB4,EGR2,GPRC5A,HSPH1,LPAR1,MBNL2,NEDD9,PDLIM5,SGK1,SLC2A3,SUB1,THBS1,TNIK,TREM1	21
Cardiovascular Disease	aortic aneurysm	2.53e-07	ACTA2,COL1A1,CTSC,CTSK,CTSS,FBN1,MMP3,MYLK,PIK3C2A,TGFBR2,TIMP3	11
Cardiovascular Disease	aortic disorder	7.58e-07	ACTA2,AHR,COL1A1,CTSC,CTSK,CTSS,EFEMP2,FBN1,HMOX1,LOX,MMP3,MYLK,NRP1,PIK3C2A,PLOD1,TGFBR2,TIMP3,TNFRSF11B	18
Cardiovascular Disease	arteriosclerosis	2.15e-06	AHR,CAV1,CD55,CDH13,COL5A2,CTSS,CXCL2,FADS1,FN1,GCLM,HMOX1,IL1A,IL1B,IL1R1,KDR,MFGE8,MMP3,NCEH1,NNMT,PTGS1,SGCD,SLC7A11,SPARC,TGFBR2,THBS1,TIMP3,TKT,TNFRSF11B,TUBA1A,VCAM1,VEPH1	31
Cardiovascular Disease	atherosclerosis	4.63e-06	AHR,CAV1,CD55,CDH13,COL5A2,CTSS,CXCL2,FADS1,FN1,GCLM,HMOX1,IL1A,IL1B,IL1R1,KDR,MFGE8,MMP3,NCEH1,NNMT,PTGS1,SGCD,SLC7A11,TGFBR2,THBS1,TIMP3,TKT,TNFRSF11B,TUBA1A,VCAM1,VEPH1	30
Cardiovascular Disease	arterial dissection	2.31e-05	COL1A1,FBN1,PLOD1,TNFRSF11B,VKORC1	5
Cardiovascular Disease, Organismal Injury and Abnormalities	cardiomyopathy	3.34e-05	AHR,BIN1,BNIP3L,CAV1,FGF2,IL1B,IL1R1,LEPR,LIMS1,MYOZ2,PDLIM5,PPP3CB,PTGS1,SGCD,THBS2,TIMP3,TOP2A,TPI1,VCAM1,VHL,VKORC1,YAP1	22
Cardiovascular Disease	advanced stage peripheral arterial occlusive disease	4.35e-05	ARHGDIB,BDNF,CEMIP,COL1A1,COL1A2,CTSS,DNAJB4,GPRC5A,HSPH1,NEDD9,PDLIM5,SUB1,THBS1,TNIK	14
Cardiovascular Disease	mid stage peripheral arterial occlusive disease	7.57e-05	ARHGDIB,CEMIP,CTSC,CTSS,DNAJB4,EGR2,LPAR1,MBNL2,PDLIM5,SGK1,SLC2A3,SUB1,THBS1,TREM1	14
Cardiovascular Disease	Infarction	8.59e-05	ACTA2,BDNF,BNIP3,CAV1,CD55,FGF2,FN1,GCLM,HGF,HMOX1,HTRA1,IL1A,IL1B,IL1R1,PIM1,PPP3CB,PRNP,PTGS1,SH3BP5,STAT1,TNFRSF11B	21
Cardiovascular Disease, Hematological Disease	Thrombosis	0.000126	AHR,AKT3,ANGPT1,FBN1,GRIK2,HIVEP1,HMOX1,IL1B,KDR,NNMT,PPP3CB,PTGS1,THBS1,VKORC1	14
Cardiovascular Disease, Connective Tissue Disorders, Developmental Disorder, Hereditary Disorder, Skeletal and Muscular Disorders	Loeys-Dietz syndrome	0.00015	ACTA2,FBN1,MYLK,TGFBR2	4
Cardiovascular Disease, Hereditary Disorder	familial thoracic aortic aneurysm	0.00015	ACTA2,FBN1,MYLK,TGFBR2	4
Cardiovascular Disease	aortic dissection	0.000372	COL1A1,FBN1,PLOD1,TNFRSF11B	4
Cardiovascular Disease	disorder of vein	0.000524	ANGPT1,HIVEP1,KDR,MMP3,NNMT,PTGS1,SEMA3D,THBS1,VKORC1	9
